# Supplementary material for: Liposome-coated nanoparticle triggers prostate cancer ferroptosis through synergetic chemodynamic-gas therapy
Source: Royal Society of Chemistry journal article supplement (doi:10.1039/d3na00877k), 2023-12-19
Supplement: d3na00877k1.pdf [file d3na00877k1.pdf]

## Supplemental Files

### Liposome-Coated Nanoparticle Triggers Prostate Cancer Ferroptosis through Synergetic Chemodynamic-Gas Therapy

Yingkai Hong<sup>1,2</sup>, Wenli Hou<sup>1</sup>, Dehua Ou<sup>2</sup>, Mingren Lin<sup>2</sup>, Mayao Luo<sup>1</sup>, Qiang Wei<sup>1</sup>

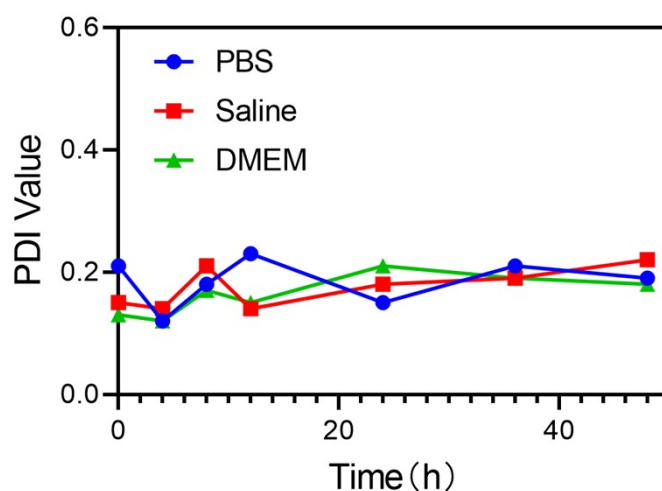

Figure S1. Changes of PDI value of Lpo@MnS-GOx NPs in PBS, Saline, and DMEM.

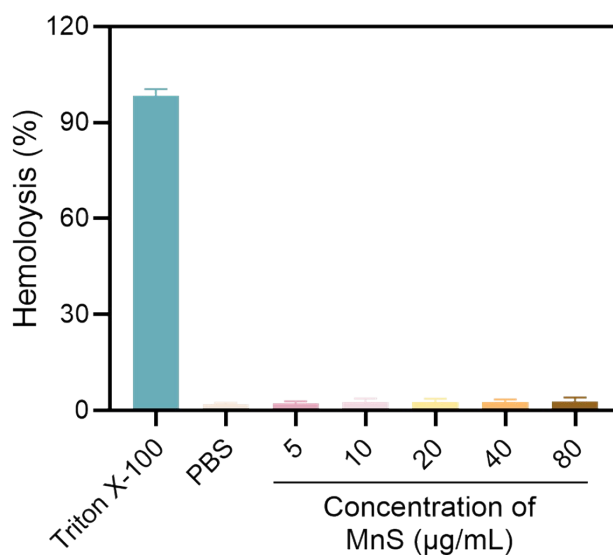

Figure S2. The hemolytic potential of different concentrations of Lpo@MnS-GOx NPs were evaluated. Triton X-100 was used as positive control, while PBS as negative control.

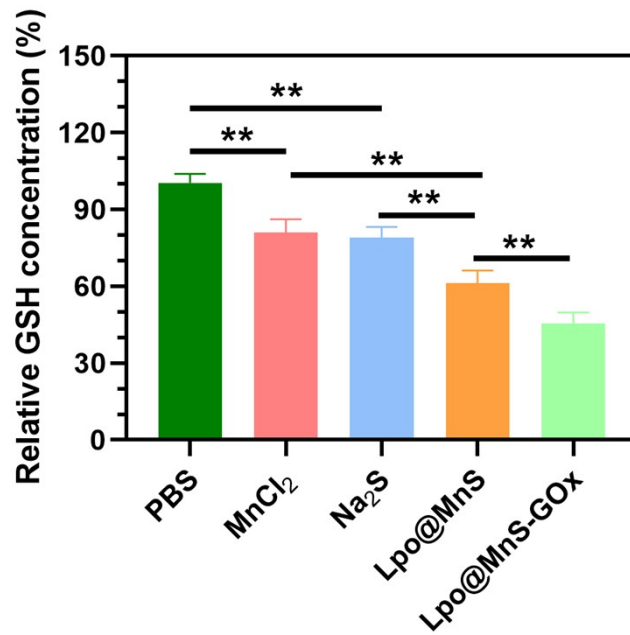

**Figure S3.** Detection of GSH level of PC-3 cells after various treatment. \*\* $P < 0.05$ , \*\*\* $P < 0.001$ .

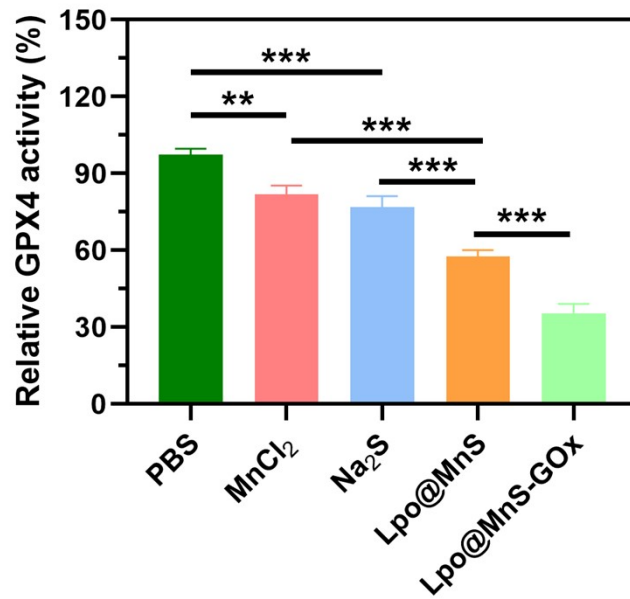

**Figure S4.** Evaluation of GPX4 activity within PC-3 cells. \*\* $P < 0.01$ , \*\*\* $P < 0.001$ .

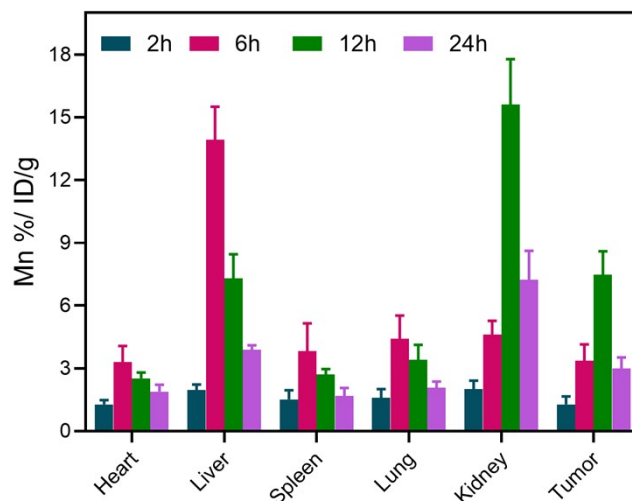

**Figure S5.** In vivo distributions of Mn ions after intravenous administration of Lpo@MnS-GOx NPs into tumor-bearing mice for different post-injection time points.

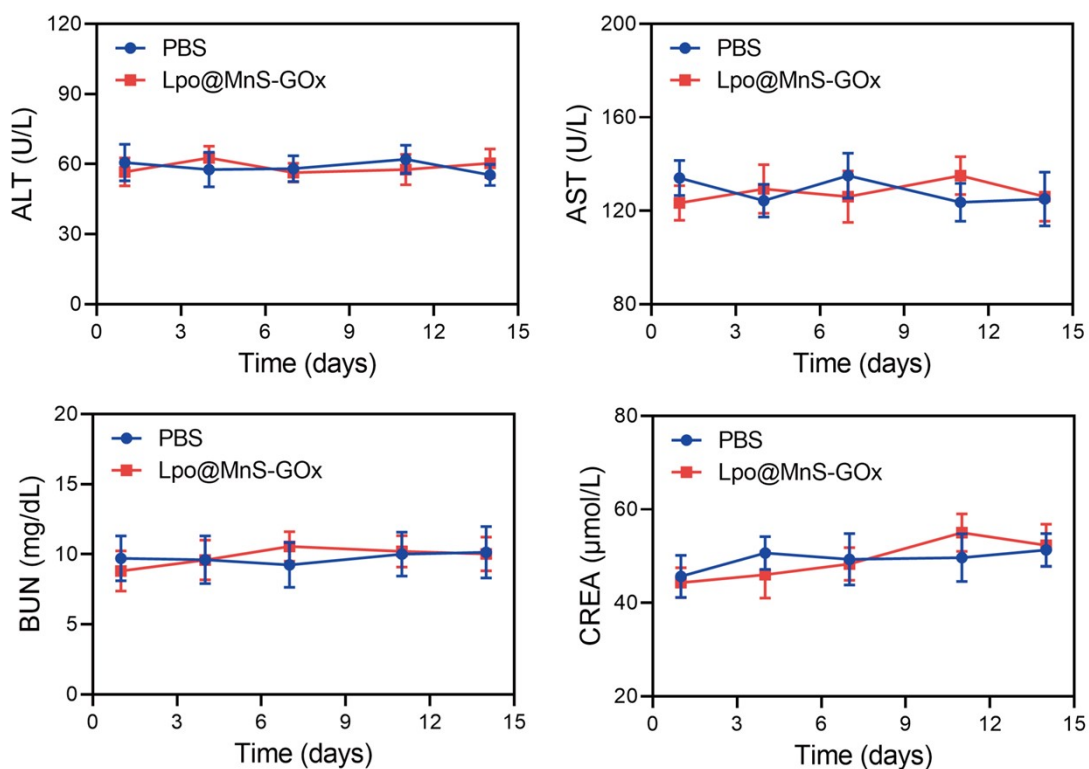

**Figure S6.** Biochemical parameters in serum collected from mice treated with PBS, and Lpo@MnS-GOx NPs were evaluated. AST, aspartate aminotransferase; ALT: alanine aminotransferase; BUN: blood urea nitrogen; CREA: serum creatinine.

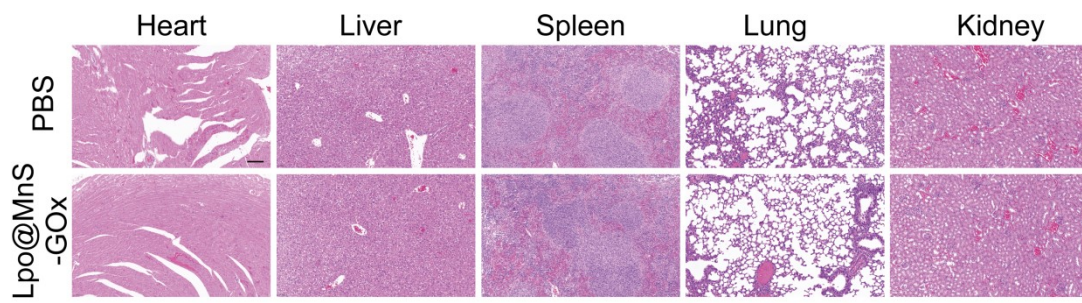

**Figure S7.** Histopathological analysis of major organs and tissues isolated from Lpo@MnS-GOx-treated mice. Scale bar, 100  $\mu\text{m}$ .
